# Supplementary material for: Characterizing and inferring quantitative cell cycle phase in single-cell RNA-seq data analysis
Source: HighWire-hosted journal article supplement (doi:10.1101/gr.247759.118), 2020-04-01
Supplement: Supplemental_peco-paper-master-source-code.tar.gz [file nmeth.3549-S2.xlsx]

version https://git-lfs.github.com/spec/v1
oid sha256:904357983ba8bdf494f03c3401483b5f863eb8a4f90c25675d18fc2f52057fec
size 31025
